# Supplementary material for: Conformational Ensembles of Antibodies Determine Their Hydrophobicity
Source: PubMed Central journal article supplement — Biophys J. 2020 Nov 18;120(1):143–57. doi: 10.1016/j.bpj.2020.11.010 (PMC7820740; doi:10.1016/j.bpj.2020.11.010), 2020-11-18
Supplement: mmc1.pdf [file mmc1.pdf]

**Biophysical Journal, Volume 120**

**Supplemental Information**

**Conformational Ensembles of Antibodies Determine Their  
Hydrophobicity**

**Franz Waibl, Monica L. Fernández-Quintero, Anna S. Kamenik, Johannes Kraml, Florian Hofer, Hubert Kettenberger, Guy Georges, and Klaus R. Liedl**

# Conformational Ensembles of Antibodies Determine Their Hydrophobicity

Effect of Conformation and Protonation

Franz Waibl<sup>1</sup> (FW), Monica L. Fernández-Quintero<sup>1</sup> (MLF), Anna S. Kamenik<sup>1</sup> (ASK), Johannes Kraml<sup>1</sup> (JK), Florian Hofer<sup>1</sup> (FH), Hubert Kettenberger<sup>2</sup> (HK), Guy Georges<sup>2</sup> (GG), Klaus R. Liedl<sup>1\*</sup> (KRL)

1: Institute of General, Inorganic and Theoretical Chemistry, and Center for Molecular Biosciences Innsbruck (CMBI), University of Innsbruck, Innsbruck, Austria

2: Roche Pharma Research and Early Development, Large Molecule Research, Roche Innovation Center Munich, Penzberg, Germany

## Supporting Information

### 1. Combining $\Delta G(\text{solv})$ of cluster representatives

Given a set of conformations (in this case, cluster representatives), for each of which the free energy of solvation  $\Delta G_{\text{solv}}$  has been estimated using GIST, the free energy of solvation of the ensemble is given as

$$\Delta G_{\text{solv}} = k_B T \ln \int e^{-\frac{\Delta G_{\text{solv}}(q)}{k_B T}} p(q) dq$$

Where  $k_B$  is Boltzmann's constant,  $T$  is the temperature,  $q$  denotes the cartesian coordinates of the respective conformation,  $p(q)$  is the probability of the conformation (or, in the case of cluster representatives, the population of the respective cluster), and  $\Delta G_{\text{solv}}(q)$  is the hydration free energy of the conformation.

This equation places a high weight on conformations with a positive free energy of hydration. Conceptually, this stems from the fact that  $\Delta G_{\text{solv}}$  is not purely a property of the simulated (solution) state, but a difference between two different states, the reference state being defined by an isolated solute in gas phase and all the water being transferred to the bulk. In the present publication, we estimate cluster probabilities in the liquid state. Since conformations with a high (not very negative)  $\Delta G_{\text{solv}}$  are most favorable in the gas phase, they are the most likely to participate in the equilibrium between solution and gas states, and therefore need to be given a higher weight. If our cluster probabilities had been determined in the gas state, we would need to use a different equation.

We begin our derivation by writing  $\Delta G_{solv}$  in terms of partition sums:

$$\frac{\Delta G_{solv}}{k_B T} = -\ln \frac{Z^{sol}}{Z^u Z^v} = \ln \frac{Z^u Z^v}{Z^{sol}} \quad (1)$$

Where  $Z^{sol}$ ,  $Z^v$ , and  $Z^u$  represent the partition sums of the solution, the pure solvent, and the solute in gas phase, respectively.

Writing out the terms of the partition sums gives:

$$Z^u = \int e^{-\frac{H^{uu}(q_u)}{k_B T}} dq_u \quad (2)$$

$$Z^v = \int e^{-\frac{H^{vv}(q_v)}{k_B T}} dq_v \quad (3)$$

$$Z^{sol} = \int \int e^{-\frac{H^{uu}(q_u)+H^{vv}(q_v)+H^{uv}(q_u,q_v)}{k_B T}} dq_v dq_u \quad (4)$$

Where  $q_u$  denotes the solute degrees of freedom,  $q_v$  the solvent degrees of freedom, and  $H^{uu}$ ,  $H^{vv}$ , and  $H^{uv}$  denote the solute-solute, solvent-solvent, and solute-solvent energy contributions.

The probability of finding a solute conformation  $p(q_u)$  in a molecular dynamics simulation is:

$$p(q_u) = \frac{\int e^{-\frac{H^{uu}(q_u)+H^{vv}(q_v)+H^{uv}(q_u,q_v)}{k_B T}} dq_v}{Z^{sol}} \quad (5)$$

Assuming that  $H^{uu}$  is independent of the solvent degrees of freedom, we write this as:

$$p(q_u) = \frac{\int e^{-\frac{H^{vv}(q_v)+H^{uv}(q_u,q_v)}{k_B T}} dq_v e^{-\frac{H^{uu}(q_u)}{k_B T}}}{Z^{sol}} \quad (6)$$

From each GIST calculation, we obtain an estimate of the hydration free energy of a single solute conformation, i.e., the change in free energy upon placing a solute *in this conformation* from the gas phase into the solution phase. We write this as:

$$e^{-\frac{\Delta G_{solv}(q_u)}{k_B T}} = \frac{\int e^{-\frac{H^{vv}(q_v)+H^{uv}(q_u,q_v)}{k_B T}} dq_v}{Z^v} \quad (7)$$

Here, the partition sum of the solute  $Z^v$  is practically introduced by referencing our GIST results to a pure solvent box.

Inserting the righthand side of Eq. 7 into Eq. 6 gives us:

$$p(q_u) = \frac{e^{-\frac{\Delta G_{solv}(q_u)}{k_B T}} e^{-\frac{H^{uu}(q_u)}{k_B T}} Z^v}{Z^{sol}} \quad (8)$$

To arrive at an expression of the total  $\Delta G_{solv}$ , we first note that we do not have an expression for the (gas phase) solute ensemble  $Z^u$ . We therefore seek to express Eq. 2 in terms of other quantities. We do so by separating the term involving  $H^{uu}$  in Eq. 8 and inserting it to Eq. 2. We arrive at:

$$Z^u = \frac{\int p(q_u) e^{\frac{\Delta G_{solv}(q_u)}{k_B T}} Z^{sol}}{Z^v} dq_u \quad (9)$$

Note the positive sign before  $\Delta G_{solv}(q_u)$  that arises from taking its reciprocal value.  $Z^u$  and  $Z^{sol}$  are already integrals and therefore independent of  $q_u$  and can be separated.

Inserting Eq. 9 in Eq. 1 results in:

$$\frac{\Delta G_{solv}}{k_B T} = \ln \int p(q_u) e^{\frac{\Delta G_{solv}(q_u)}{k_B T}} dq_u \quad (10)$$

## 2. Used PDB codes

SI Table 1: PDB codes used as starting structures for the molecular dynamics (both GaMD and CpHMD) simulations.

| Antibody      | PDB  |
|---------------|------|
| Adalimumab    | 4NYL |
| alemtuzumab   | 1BEY |
| Anifrolumab   | 4QXG |
| Atezolizumab  | 5X8L |
| bapineuzumab  | 4OJF |
| Basiliximab   | 1MIM |
| Belimumab     | 5Y9J |
| Bevacizumab   | 1BJ1 |
| Bevacizumab   | 6BFT |
| Bimagrumab    | 5NGV |
| Briakinumab   | 5N2K |
| Canakinumab   | 4G6J |
| Certolizumab  | 5WUX |
| Cetuximab     | 1YY8 |
| Crenezumab    | 5VZY |
| Daclizumab    | 3NFP |
| Drozitumab    | 4OD2 |
| Eculizumab    | 5I5K |
| Efalizumab    | 3EOA |
| epratuzumab   | 5VL3 |
| gantenerumab  | 5CSZ |
| gevokizumab   | 4G6M |
| Golimumab     | 5YOY |
| Ibalizumab    | 3O2D |
| Infliximab    | 4G3Y |
| Ipilimumab    | 5TRU |
| ixekizumab    | 6NOV |
| lebrikizumab  | 4I77 |
| matuzumab     | 3C09 |
| motavizumab   | 3IXT |
| muromonab     | 1SY6 |
| natalizumab   | 4IRZ |
| necitumumab   | 6B3S |
| nivolumab     | 5WT9 |
| ofatumumab    | 3GIZ |
| olokizumab    | 4CNI |
| omalizumab    | 2XA8 |
| onartuzumab   | 4K3J |
| panitumumab   | 5SX5 |
| pembrolizumab | 5GGS |
| pertuzumab    | 1S78 |
| pinatuzumab   | 6AND |
| ponezumab     | 3U0T |
| ranibizumab   | 1CZ8 |
| rituximab     | 6VJA |
| sifalimumab   | 4YPG |
| tanezumab     | 4EDW |
| tralokinumab  | 5L6Y |
| trastuzumab   | 1N8Z |
| tremelimumab  | 5GGV |
| urelumab      | 6MHR |
| ustekinumab   | 3HMW |

### 3. Experimental details

In the present work, we use experimental data from a dataset by Jain et al. (1) Here, we shortly describe the experimental conditions of the assays that we mention in the main text. For more detailed information, the reader is referred to the original works.

#### Hydrophobic Interaction Chromatography:

The methodology described in reference (2) was used. 5  $\mu\text{g}$  (1 mg/mL) of sample was analyzed using a Sepax Proteomix HIC butyl-NP5 column over 20 min. A linear gradient from mobile phase A (1.8M ammonium sulfate and 0.1M sodium phosphate at pH 6.5) to mobile phase B (0.1 M sodium phosphate at pH 6.5) was employed with a flow rate of 1 mL/min. The UV adsorbance was monitored at 280 nm.

#### Standup Monolayer Adsorption Chromatography:

The methodology described in reference (3) was used. 2  $\mu\text{g}$  of sample was analyzed using a Zenix SEC-300 column. A 0.15M sodium phosphate buffer at pH 7.0 was used as mobile phase, with a flow rate of 0.35 mL/min.

#### Cross Interaction Chromatography:

The methodology described in reference (4) was used. 5  $\mu\text{g}$  of sample was analyzed using a 1-mL HiTrap column with  $\sim 30\text{mg}$  of human serum polyclonal antibodies coupled to it. A PBS buffer was used as mobile phase, with a flow rate of 0.1 mL/min.

### 4. Effect of the ROC cutoff and the cutoff for $\Delta G_{\text{unfavorable}}$

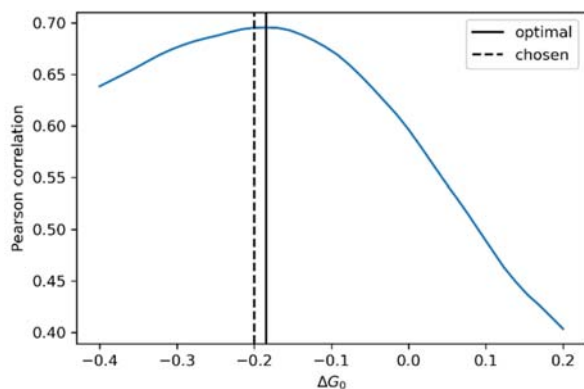

Figure 1: Pearson correlation between experimental HIC retention times of the PDB set and  $\Delta G_{\text{unfavorable}}$ , depending on the  $x$  offset in the cutoff function (corresponds to  $\Delta G_0$  in Equation 8). The optimal value (the  $x$  position with the highest correlation), as well as the rounded value used in this study, are shown as vertical lines. The input data was the  $\Delta G_{\text{solv}}$  values obtained after GaMD sampling of the PDB set. Computing  $\Delta G_{\text{unfavorable}}$  using the chosen  $\Delta G_0$  leads to the data shown in Figure 1E.

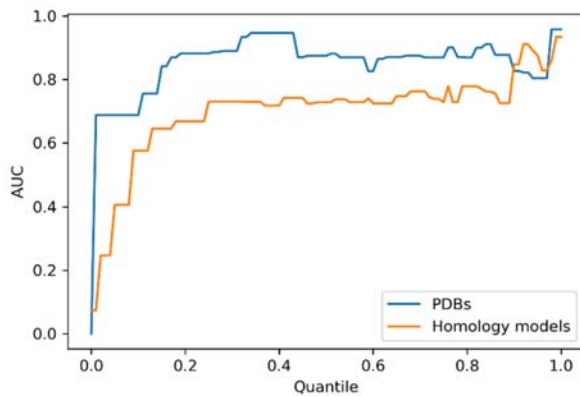

Figure 2: AUC value for the separation between strongly-binding and weakly-binding antibodies in the PDB set (blue) and in the homology models set (orange), depending on the quantile at which the border between strongly-binding and weakly-binding was drawn. The separation was performed based on the  $\Delta G_{\text{unfavorable}}$  values shown in Figure 1E.

1. Jain, T., T. Sun, S. Durand, A. Hall, N. Houston, J. Nett, B. Sharkey, B. Bobrowicz, I. Caffry, Y. Yu, Y. Cao, H. Lynaugh, M. Brown, H. Baruah, L. Gray, E. Krauland, Y. Xu, M. Vasquez, and K. Wittrup. 2017. Biophysical properties of the clinical-stage antibody landscape. *Proceedings of the National Academy of Sciences of the United States of America* 114(5):944-949. Article.
2. Estep, P., I. Caffry, Y. Yu, T. W. Sun, Y. Cao, H. Lynaugh, T. Jain, M. Vasquez, P. M. Tessier, and Y. D. Xu. 2015. An alternative assay to hydrophobic interaction chromatography for high-throughput characterization of monoclonal antibodies. *Mabs* 7(3):553-561.
3. Kohli, N., N. Jain, M. L. Geddie, M. Razlog, L. H. Xu, and A. A. Lugovskoy. 2015. A novel screening method to assess developability of antibody-like molecules. *Mabs* 7(4):752-758.
4. Jacobs, S. A., S. J. Wu, Y. Q. Feng, D. Bethea, and K. T. O'Neil. 2010. Cross-Interaction Chromatography: A Rapid Method to Identify Highly Soluble Monoclonal Antibody Candidates. *Pharm Res-Dordr* 27(1):65-71.
